# Supplementary material for: A functional variant of SMAD4 enhances macrophage recruitment and inflammatory response via TGF-β signal activation in Thoracic aortic aneurysm and dissection
Source: publisher site journal article supplement (doi:10.18632/aging.101662), 2018-12-07
Supplement: Supplementary file [file aging-v10i12-101662-supplementary-material-SD1.pdf]

SUPPLEMENTARY FIGURES

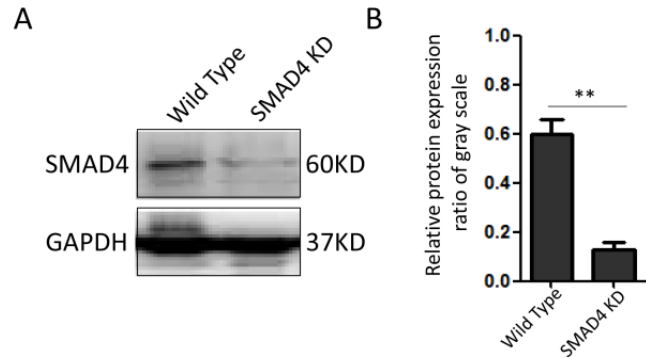

**Supplementary Figure 1. Significantly reduced SMAD4 expression in SMAD4-KD mouse.** (A) Western blot for SMAD4 expression in Wild Type and SMAD4-KD mouse. (B) Quantitative analysis for (A) Data were presented as mean  $\pm$  SD. \*\* $P < 0.01$ .

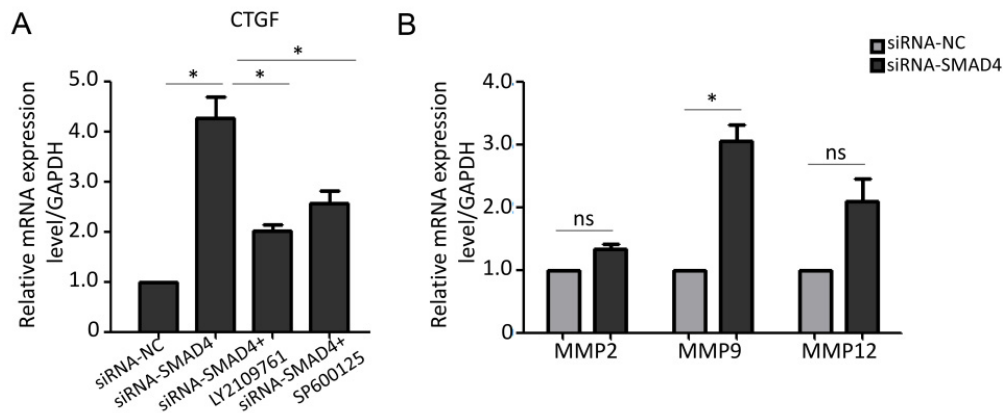

**Supplementary Figure 2. CTGF and MMPs expression in different HASMCs.** (A) qPCR detection for CTGF expression in HASMCs treated with siRNAs or SMAD2/JNK phosphorylation inhibitors. (B) qPCR detection for MMPs expression in HASMCs transfected with siRNA-NC or si-RNA-SMAD4. Data were presented as mean  $\pm$  SD. \* $P < 0.05$ , ns: not significant.
