# Supplementary material for: A functional variant of SMAD4 enhances macrophage recruitment and inflammatory response via TGF-β signal activation in Thoracic aortic aneurysm and dissection
Source: publisher site journal article supplement (doi:10.18632/aging.101662), 2018-12-07
Supplement: Supplementary file [file aging-v10i12-101662-supplementary-material-SD2.pdf]

## SUPPLEMENTARY TABLES

**Supplementary Table 1. Demographics and clinical features of the TAAD patients involved in this study.**

| Item                                 | Screening cohort<br>n=202 | Validation cohort<br>n=227 | <i>P</i> |
|--------------------------------------|---------------------------|----------------------------|----------|
| Age                                  | 54.1±14.2                 | 55.2±12.7                  | 0.633    |
| Men(%)                               | 75.2                      | 72.1                       | 0.727    |
| Hypertension(%)                      | 40.1                      | 37.3                       | 0.423    |
| Diabetes(%)                          | 14.4                      | 12.6                       | 0.652    |
| Smoking(%)                           | 52.0                      | 46.5                       | 0.543    |
| Body mass index (kg/m <sup>2</sup> ) | 23.9±4.0                  | 24.5±4.2                   | 0.768    |
| Thoracic aortic diameter(mm)         | 53.2±8.0                  | 52.2±9.7                   | 0.439    |
| D-dimer(μg/ml)                       | 7.82±3.98                 | 7.82±3.98                  | 0.185    |
| CRP(μg/ml)                           | 13.22±6.33                | 13.22±6.33                 | 0.299    |
| HDL-c                                | 1.15±0.29                 | 1.26±0.29                  | 0.071    |
| LDL-c                                | 2.45±0.80                 | 2.39±0.87                  | 0.299    |

**Supplementary Table 2. Logistic regression analysis of associations between candidate SNPs and TAAD risk.**

| Loci (Gene)                | HWE, <i>P</i> | Crude OR (95%CI)    | <i>P</i> <sup>a</sup> | Adjusted OR (95%CI) | <i>P</i> <sup>b</sup> |
|----------------------------|---------------|---------------------|-----------------------|---------------------|-----------------------|
| rs12913975(SMAD6) G>A      | 0.189         | 1.500(1.113-2.022)  | <b>0.009</b>          | 1.489(1.101-2.009)  | <b>0.012</b>          |
| rs17470137(CCDC100) G>A    | 0.072         | 1.119(0.102-12.239) | 1.000                 | 1.108(0.097-12.230) | 1.000                 |
| rs10757278(CDKN2B-AS1) A>G | 0.349         | 2.020(1.353-3.016)  | <b>0.001</b>          | 2.006(1.342-3.002)  | <b>0.005</b>          |
| rs6045676(PDYN-AS1) C>G    | 0.391         | 1.057(0.811-1.377)  | 0.743                 | 1.046(0.800-1.362)  | 0.855                 |
| rs875971(CRCP) T>C         | 0.472         | 0.730(0.613-1.068)  | 0.112                 | 0.722(0.601-1.052)  | 0.236                 |
| rs755251(FBN1) A>G         | 0.563         | 1.001(0.860-1.164)  | 1.000                 | 0.987(0.853-1.159)  | 1.000                 |
| rs10258739(TYW1) A>T       | 0.411         | 1.027(0.874-1.206)  | 0.832                 | 1.015(0.869-1.201)  | 0.952                 |
| rs10852932(SMG6) T>G       | 0.237         | 0.985(0.653-1.485)  | 0.941                 | 0.976(0.642-1.471)  | 0.989                 |
| rs1825630(FHIT) C>T        | 0.089         | 1.020(0.911-1.143)  | 0.809                 | 1.009(0.893-1.131)  | 0.925                 |
| rs10770612(LINC02398) A>G  | 0.152         | 1.773(1.252-2.510)  | <b>0.001</b>          | 1.767(1.245-2.497)  | <b>0.003</b>          |
| rs2659915(RABGEF1) G>A     | 0.723         | 0.901(0.717-1.132)  | 0.407                 | 0.893(0.708-1.121)  | 0.519                 |
| rs10263935(KCTD7) G>A      | 0.171         | 0.938(0.750-1.174)  | 0.605                 | 0.938(0.750-1.174)  | 0.753                 |
| rs4774517(FBN1) G>T        | 0.526         | 0.994(0.864-1.143)  | 1.000                 | 0.987(0.859-1.137)  | 1.000                 |
| rs1036477(FBN1) A>G        | 0.109         | 0.959(0.775-1.188)  | 0.755                 | 0.952(0.769-1.181)  | 0.829                 |
| rs1333049(CDKN2B-AS1) G>C  | 0.652         | 0.714(0.563-1.119)  | 0.543                 | 0.709(0.558-1.112)  | 0.597                 |
| rs10519177(FBN1) A>G       | 0.328         | 1.005(0.875-1.153)  | 1.000                 | 1.001(0.870-1.149)  | 1.000                 |
| rs2118181(FBN1) T>C        | 0.419         | 0.959(0.775-1.188)  | 0.755                 | 0.952(0.769-1.181)  | 0.837                 |
| rs10733710(TGFBR1) G>A     | 0.563         | 1.431(1.143-1.792)  | <b>0.002</b>          | 1.412(1.140-1.785)  | <b>0.005</b>          |
| rs12455792(SMAD4) T>C      | 0.936         | 1.591(1.093-2.312)  | <b>0.009</b>          | 1.583(1.091-2.304)  | <b>0.011</b>          |
| rs6045666(PDYN-AS1) C>T    | 0.723         | 1.048(0.805-1.362)  | 0.747                 | 1.043(0.802-1.360)  | 0.823                 |

CI, confidence interval; OR, odds ratio; The results were in bold, if *P* < 0.05.

<sup>a</sup> Chi-square test for genotype distributions between cases and controls. <sup>b</sup> Adjusted for age, sex, smoking status in logistic regression models.

**Supplementary Table 3. The association between significant SNPs and thoracic aortic diameter in the study.**

| Significant SNPs Genotypes | D-Thoracic aortic diameter (mm) |                |                         |                |
|----------------------------|---------------------------------|----------------|-------------------------|----------------|
|                            | Screening data (n=202)          |                | Validation data (n=227) |                |
|                            | D≤40/40<D≤50/D>50               | P <sup>a</sup> | D≤40/40<D≤50/D>50       | P <sup>b</sup> |
| rs10733710                 |                                 |                |                         |                |
| GG                         | 44/49/26                        | 0.477          | 51/51/28                | 0.501          |
| GA+AA                      | 36/30/17                        |                | 41/37/20                |                |
| rs10757278                 |                                 |                |                         |                |
| AA                         | 29/28/12                        | 0.396          | 33/31/15                | 0.357          |
| AG+GG                      | 51/51/31                        |                | 59/57/33                |                |
| rs12455792                 |                                 |                |                         |                |
| CC                         | 29/17/8                         | <b>0.020</b>   | 34/22/12                | <b>0.016</b>   |
| CT+TT                      | 51/62/35                        |                | 57/66/36                |                |
| rs12913975                 |                                 |                |                         |                |
| GG                         | 63/53/27                        | <b>0.046</b>   | 70/55/26                | <b>0.042</b>   |
| GA+AA                      | 17/26/16                        |                | 22/33/22                |                |
| rs1333049                  |                                 |                |                         |                |
| GG                         | 31/41/19                        | 0.387          | 38/46/23                | 0.452          |
| GC+CC                      | 49/38/24                        |                | 54/42/25                |                |

The significant *P* value were in bold.

MM/Mm/mm: Major homozygote/heterozygote/minor homozygote.

<sup>a</sup> For screening data. <sup>b</sup> For validation data.

**Supplementary Table 4. Primers for PCR and single-base extension reaction in MALDI-TOF MS assay.**

| Loci (Gene)             | Chr:position | Forward primer <sup>a</sup>  | Reverse primer <sup>a</sup> | Extension primer           | Amplicon size(bp) |
|-------------------------|--------------|------------------------------|-----------------------------|----------------------------|-------------------|
| rs12913975 (SMAD6)      | 15:66764823  | linker-TCCTTCTTTGATCTCACGGC  | linker-GGGTACTTGATGTCAGCAAC | TCCATCCAGCTAGCA            | 212               |
| rs17470137 (CCDC100)    | 5:123195653  | linker-TTCTTTGCTTACGCTGTAGG  | linker-TCAGAATCGTCCCATCCAAG | CGCTGTAGGCTCAGT            | 145               |
| rs10757278 (CDKN2B-AS1) | 9:22124478   | linker-AGTTGGAAGTGAAGTGAAGG  | linker-ACTCTGTCTTGATTCTGCAT | TATTCTGCATCGCTGC           | 167               |
| rs6045676 (PDYN-AS1)    | 20:1960525   | linker-GAATTCATCACCAGCATAACC | linker-TCAGACTCCCATCTGGTATC | CACCAGCATACTGTATA          | 192               |
| rs875971 (CRCP)         | 7:66152608   | linker-AACAGGCTGAGGTTGTCAGG  | linker-AAAGGCCGTGGAGGAAATCT | GGAGGAAATCTTTCAAGC         | 182               |
| rs755251 (FBN1)         | 15:48519823  | linker-ACTGGGATTAGATTTGGGAC  | linker-CTCAGGCAATATTTAGTGGC | CATTTGCTACTTAGCACAG        | 101               |
| rs10258739 (TYW1)       | 7:66597948   | linker-GAGTGAATAATACCACCTC   | linker-CTGAGTTCACCACGAGTTTC | CCAATACCACCTCATTCA         | 95                |
| rs10852932 (SMG6)       | 17:2240166   | linker-GAGATGACTCTGTCCCTATC  | linker-TCACAAGGCAGCCACTTTAG | CCCGCCACTTTAGTCAGTGA       | 107               |
| rs1825630 (FHIT)        | 3:59917075   | linker-ATGGACTCTGAGCCCATTGT  | linker-GGGCTGGAGAGAACCATTAT | AAGAGATCCAAGTTCAACAA       | 229               |
| rs10770612 (LINC02398)  | 12:20077705  | linker-AGAGTCTAATCTGTTTGGGC  | linker-ATCTCTGTGCCAATACCCTG | GGGGTTACCAATACAGGAAC       | 171               |
| rs2659915 (RABGEF1)     | 7:66688114   | linker-TGTTATTGCACTCCAGCCT   | linker-TGCCAATATGGCCACTC    | CCTTGCCACTCCTGATGTCAT      | 155               |
| rs10263935 (KCTD7)      | 7:66631041   | linker-TCTGAGCCCTTGATATACAC  | linker-GCACCCACAGGACATGAAAA | CTCTAGGACCTACAGAATAA       | 91                |
| rs4774517 (FBN1)        | 15:48467094  | linker-ATGGGTGACAAGTGGAG     | linker-TCAAATAGGCCTCAGAAAG  | GC<br>GGACAAGTGGAGTCCTA    | 102               |
| rs1036477 (FBN1)        | 15:48622729  | linker-CCTACAGCCCAAAGATGGAC  | linker-GTGAAGTTGAAGGTATAGG  | AT<br>AGGTATAGGTAAAGATAAGA | 201               |

|                           |             |                                 |                                  |                                  |     |
|---------------------------|-------------|---------------------------------|----------------------------------|----------------------------------|-----|
| rs1333049<br>(CDKN2B-AS1) | 9:22125504  | linker-<br>ATGGTCACTACCCTACTGTC | linker-<br>GCATACTTTTGTCAACACAG  | ATACTAACCATATGATCAAC<br>AGTT     | 124 |
| rs10519177<br>(FBN1)      | 15:48464998 | linker-<br>CTTATGCAGAGCACAAGGAG | linker-<br>AGCCATGAGCCATGGTTTTTC | GGTCGACATGGAGGAATCAC<br>ACAA     | 178 |
| rs2118181<br>(FBN1)       | 15:48623687 | linker-<br>TCATGCGGCCAATTCCTACA | linker-<br>CAAGCAGCACATCCAAAGAG  | GGAAAGACAATCATGACAAA<br>ATTCA    | 113 |
| rs10733710<br>(TGFB1)     | 9:99145142  | linker-<br>TGATGAAAGGTTGCCCTTCC | linker-<br>ACCTATTAGACGATTGGCAC  | GGGGAACATAGTAGGTGCC<br>TATAAA    | 97  |
| rs12455792<br>(SMAD4)     | 18:51046270 | linker-<br>AGTGAGGGTCCAATTTCTCG | linker-<br>GCTACTTCATACCTACTGAG  | CTGAGATGGATATATCAAAA<br>AGACAATA | 106 |
| rs6045666<br>(PDYN-AS1)   | 20:1959858  | linker-<br>GCTTGAAGGAGAAATAATGG | linker-<br>GGGTTCACTGGGTTTCTTCA  | ACTTTGCCAAATTTGATGTAA<br>ACAAA   | 121 |

<sup>a</sup>linker=10-mer linker ACGTTGGATG placed at 5'-end of each primer.

**Supplementary Table 5. Primers of TGF- $\beta$  signaling molecules and chemotactic factors in real-time PCR assay.**

| Gene   | Species | Primer sequence                                            | Amplicon size(bp) |
|--------|---------|------------------------------------------------------------|-------------------|
| GAPDH  | Human   | 5'-GAGCACAAGAGGAAGAGA-3'<br>5'-CACAGGGTACTTTATTGATGG-3'    | 167               |
| IL1-B  | Human   | 5'-CAGAAGTACCTGAGCTCGCC-3'<br>5'-AGATTCGTAGCTGGATGCCG-3'   | 153               |
| CX3CL1 | Human   | 5'-CGCGCAATCATCTTGGAGAC-3'<br>5'-AGGACCACAGACTCGTCCAT-3'   | 200               |
| CXCL3  | Human   | 5'-AACCGAAGTCATAGCCACACT-3'<br>5'-ATTTTCAGCTCTGGTAAGGGC-3' | 192               |
| CXCL9  | Human   | 5'-TTTCCCGAAGGAAAAGGGCT-3'<br>5'-TCCACTAACCGACTTGGCTG-3'   | 227               |
| CXCL10 | Human   | 5'-CGCTGTACCTGCATCAGCAT-3'<br>5'-TGCATCGATTTTGCTCCCCT-3'   | 239               |
| CXCL12 | Human   | 5'-CTACAGATGCCCATGCCGAT-3'<br>5'-GTGGGTCTAGCGGAAAGTCC-3'   | 226               |
| CXCL13 | Human   | 5'-TGACTCTGCTAATGAGCCTGG-3'<br>5'-ATTCCCACGGGGCAAGATTT-3'  | 232               |
| CCL2   | Human   | 5'-TTCCCCTAGCTTTCCCAGCA-3'<br>5'-TCCCAGGGGTAGAACTGTGG-3'   | 204               |
| CCL3   | Human   | 5'-GCTCTCTGCAACCAGTTCTCT-3'<br>5'-CGGCTTCGCTTGGTTAGGAA-3'  | 164               |
| CCL5   | Human   | 5'-CAGTCGTCTTTGTCACCCGA-3'<br>5'-CGGGTGGGGTAGGATAGTGA-3'   | 194               |
| TGFB1  | Human   | 5'-CTGTCCAACATGATCGTGCG-3'<br>5'-TGACACAGAGATCCGCAGTC-3'   | 216               |
| TGFB2  | Human   | 5'-CGAAACTGTCTGCCAGTTG-3'<br>5'-TCCGTTGTTTCAGGCACTCTG-3'   | 239               |
| TGFB3  | Human   | 5'-GTGCCGTGAAGTGGCTTCT-3'<br>5'-TCTTCATTGGCTGGGGTGTG-3'    | 209               |
| CTGF   | Human   | 5'-AAGGGCAAAAAGTGCATCCG-3'<br>5'-CTTCTCATGACCTCGCCGT-3'    | 219               |
| ID-1   | Human   | 5'-AAACGTGCTGCTCTACGACA-3'<br>5'-AGGAACGCATGCCGCC-3'       | 256               |
| PAI    | Human   | 5'-AGAACCTGGGAATGACCGAC-3'<br>5'-TTGTGCCGGACCACAAAGAG-3'   | 223               |
